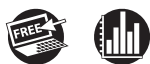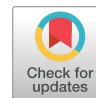

# Seasonal Variations in the Achievement of Guideline Targets for HbA<sub>1c</sub>, Blood Pressure, and Cholesterol Among Patients With Type 2 Diabetes: A Nationwide Population-Based Study (ABC Study: JDDM49)

*Diabetes Care* 2019;42:816–823 | <https://doi.org/10.2337/dc18-1953>

Masaya Sakamoto,<sup>1</sup> Daisuke Matsutani,<sup>1</sup> Soichiro Minato,<sup>1</sup> Yuki Tsujimoto,<sup>1</sup> Yosuke Kayama,<sup>2</sup> Norihiko Takeda,<sup>3</sup> Seiichi Ichikawa,<sup>4</sup> Ryuzo Horiuchi,<sup>5</sup> Kazunori Utsunomiya,<sup>1</sup> and Masako Nishikawa<sup>6</sup>

## OBJECTIVE

Precise monthly achievement rates for reaching guideline targets for HbA<sub>1c</sub>, blood pressure (BP), and lipid levels remain unknown. We evaluated achievement rates on a monthly basis in persons with type 2 diabetes mellitus (T2DM) and explored related factors.

## RESEARCH DESIGN AND METHODS

This retrospective study initially analyzed data on 104,601 persons with T2DM throughout Japan. Patients whose HbA<sub>1c</sub>, BP, and LDL cholesterol were measured  $\geq 12$  times during a 24-month period were included. We evaluated monthly achievement rates. Achieved targets were defined as HbA<sub>1c</sub>  $< 7\%$ , BP  $< 130/80$  mmHg, and LDL cholesterol  $< 100$  mg/dL. Achievement of all targets was expressed as the “all ABC achievement.”

## RESULTS

A total of 4,678 patients were analyzed. The achievement rates of all ABC, HbA<sub>1c</sub>, BP, and LDL cholesterol were lowest in winter, with those for systolic BP (SBP) being particularly low (all ABC, summer 15.6%, winter 9.6%; HbA<sub>1c</sub>, 53.1%, 48.9%; SBP, 56.6%, 40.9%; LDL cholesterol, 50.8%, 47.2%). In winter, age  $\geq 65$  years (odds ratio 0.47 [95% CI 0.34–0.63]) was independently related to decreased achievement rates for SBP, BMI  $\geq 25$  kg/m<sup>2</sup> (BMI 25–30 kg/m<sup>2</sup>, 0.45 [0.29–0.70]; BMI  $\geq 30$  kg/m<sup>2</sup>, 0.35 [0.22–0.57]), and diabetes duration  $\geq 10$  years (0.53 [0.37–0.76]) were independently related to lower achievement rates for HbA<sub>1c</sub>. Insulin use and sulfonylurea use were independently associated with the decreased all ABC achievement rates in both summer and winter.

## CONCLUSIONS

The all ABC achievement rate for guideline targets changed on a monthly basis. Seasonal variations in the all ABC achievement rate should be considered when managing T2DM in ordinary clinical practices.

<sup>1</sup>Division of Diabetes, Metabolism and Endocrinology, Department of Internal Medicine, The Jikei University School of Medicine, Minato-ku, Tokyo, Japan

<sup>2</sup>Department of Cardiology, The Jikei University School of Medicine, Minato-ku, Tokyo, Japan

<sup>3</sup>Department of Cardiovascular Medicine, Graduate School of Medicine, The University of Tokyo, Tokyo, Japan

<sup>4</sup>Department of Cardiology, Tsuruoka Kyoritsu Hospital, Tsuruoka-shi, Yamagata, Japan

<sup>5</sup>Department of Pathology, Tsuruoka Kyoritsu Hospital, Tsuruoka-shi, Yamagata, Japan

<sup>6</sup>Clinical Research Support Center, The Jikei University School of Medicine, Minato-ku, Tokyo, Japan

Corresponding author: Masaya Sakamoto, [m-sakamoto@umin.ac.jp](mailto:m-sakamoto@umin.ac.jp)

Received 24 September 2018 and accepted 23 January 2019

Clinical trial reg. no. UMIN000034231, [www.umin.ac.jp/ctr/](http://www.umin.ac.jp/ctr/)

This article contains Supplementary Data online at <http://care.diabetesjournals.org/lookup/suppl/doi:10.2337/dc18-1953/-/DC1>.

M.S., D.M., and M.N. contributed equally to this study.

© 2019 by the American Diabetes Association. Readers may use this article as long as the work is properly cited, the use is educational and not for profit, and the work is not altered. More information is available at <http://www.diabetesjournals.org/content/license>.

The goal of treatment of type 2 diabetes mellitus (T2DM) is to reduce the incidence of cardiovascular (CV) events and improve the prognosis. In T2DM, comprehensive control of blood glucose levels, blood pressure (BP), and lipid levels was reported to lead to a decreased number of CV events and an improved prognosis (1). Conversely, some large-scale clinical trials reported different results for CV outcome and mortality in the achievement of the same HbA<sub>1c</sub> target (2–4). A similar phenomenon was reported for BP (5,6) and lipid levels (7,8); therefore, target values are difficult to establish and should be revised as necessary. Currently, various academic societies have established target values as guidelines for blood glucose levels (9), BP (10), and lipid levels (11). Some recent statements have defined target values as ranges. In 2018, the American College of Physicians recommended in an evidence-based guidance statement (12) that T2DM should be treated to achieve an HbA<sub>1c</sub> level between 7% and 8% rather than 6.5% to 7%, as previously recommended.

The reason for the different results for CV outcome and mortality in those persons having achieved the same target values might be that values were measured at different time points and frequencies in many large-scale clinical trials. Differences may also be due to seasonal variations (13–15), with worse values during the winter and more favorable values during the summer. To improve the prognosis of patients with T2DM, values should be evaluated at time points that would account for seasonal variations. It is important to intensify treatment when control worsens and to prevent adverse events such as hypoglycemia (16) and low BP (17) when the control is satisfactory. However, the achievement rates necessary to formulate effective specific treatment strategies remain unknown.

In the current study, we evaluated for the first time rates of achieving guideline targets for HbA<sub>1c</sub>, BP, and LDL cholesterol on a monthly basis in patients with T2DM and explored factors affecting the achievement rates.

## RESEARCH DESIGN AND METHODS

### Patients

Thirty-eight medical clinics or general/university-affiliated hospitals specializing

in diabetes care volunteered to participate in this study. These clinics were located in different areas in Japan (latitude variations of hospitals [degrees North], 26°12'44"–43°11'46"). They all used the same software, which was specifically developed for the Japan Diabetes Clinical Data Management (JDDM) Study Group to incorporate patient records from January 2013 to December 2014. Details of the JDDM and CoDiC were described previously (18).

The inclusion criteria were patients whose HbA<sub>1c</sub>, BP, and LDL cholesterol levels were measured  $\geq 12$  times during the 2-year period; who were  $\geq 20$  years of age and  $< 75$  years of age; and who had received a diagnosis of T2DM based on criteria in the "Report of the Committee of the Japan Diabetes Society on the Classification and Diagnostic Criteria of Diabetes Mellitus" (19). Exclusion criteria were irregular clinic visits; visit intervals of  $> 2$  months; type 1 diabetes; hemodialysis for end-stage renal failure; and no information on antidiabetic drugs, antihypertensive agents, lipid-lowering agents, antiplatelet drug use, current smoking status, alcohol drinking status, family history of diabetes, or diabetes duration.

Of the 104,601 registered patients in 38 medical clinics, 4,678 were included in the analysis after excluding 82,092 patients with diabetes whose HbA<sub>1c</sub>, body weight, or BP were not measured  $\geq 12$  times over the 2 years, who had irregular clinic visits, or who had visit intervals of  $> 2$  months. Also excluded were 4,152 patients under  $< 20$  years old or  $\geq 75$  years old, 1,275 patients with type 1 diabetes or end-stage renal failure on hemodialysis, and 12,404 patients whose LDL cholesterol level was not measured  $\geq 12$  times within 2 years or had no available information on use of antidiabetic drugs, antihypertensive agents, lipid-lowering agents, or antiplatelet drugs; current smoking status; alcohol drinking status; family history of diabetes; or diabetes duration (Supplementary Fig. 1).

The ethics committee of the JDDM, which also included outside members such as lawyers and ethics experts, approved the current study. The JDDM operates as an aggregate organization under the supervision of the central analytical facility and an ethics committee. All patients provided informed consent at each participating institute in

accordance with the Guidelines for Epidemiological Studies of the Ministry of Health, Labor and Welfare of Japan.

### Measurements

HbA<sub>1c</sub> expressed in National Glycohemoglobin Standardization Program units, was measured by high-performance liquid chromatography. Plasma glucose was measured by a glucose-oxidase method. BP was measured at each local medical institution according to the recommendations of the Japanese Ministry of Health, Labor, and Welfare. Plasma total cholesterol, HDL cholesterol, and triglycerides (TGs) were assessed with standard enzymatic spectrophotometric techniques. Plasma LDL cholesterol was calculated by the Friedewald equation or  $\beta$ -quantification methods (20). The estimated glomerular filtration rate (eGFR) was calculated with the MDRD formula. Clinical data (duration of diabetes; BMI; smoking status [never, current]; alcohol drinking status [never, current]; use of antidiabetic drugs, antihypertensive agents, and lipid-lowering agents; family history of diabetes) were obtained from medical records and a questionnaire.

### Definitions

T2DM was defined according to fasting plasma glucose (FPG) concentration of  $\geq 200$  mg/dL or the provision of pharmacological treatment. In patients with an FPG concentration between  $\geq 126$  and  $< 200$  mg/dL, the measurement of FPG was repeated at another time. If the second FPG value was also  $\geq 126$  mg/dL, a diagnosis of T2DM was confirmed. Those with an FPG concentration  $< 126$  mg/dL underwent a standard oral glucose tolerance test (75 g of glucose over 2 h), and if FPG concentration was  $\geq 126$  mg/dL and/or 2-h plasma glucose concentration was  $\geq 200$  mg/dL, patients were considered to have T2DM. Hypertension was defined as systolic BP (SBP)  $\geq 140$  mmHg, diastolic BP (DBP)  $\geq 90$  mmHg, and/or the current use of antihypertensive agents based on the criteria of the American Heart Association and the American College of Cardiology (21,22). Dyslipidemia was defined as abnormal values for one or more from among HDL cholesterol  $< 40$  mg/dL, LDL cholesterol  $\geq 120$  mg/dL, TGs  $\geq 150$  mg/dL, and/or the current use of lipid-lowering agents based on criteria in

the Japan Atherosclerosis Society Guidelines (23).

Summer was defined as June, July, and August, and winter as December, January, and February. The mean values for HbA<sub>1c</sub>, SBP, DBP, and LDL cholesterol measured in the summer (2 years) and winter (2 years) were calculated for each patient by the same methods.

Achievements of targets were defined as HbA<sub>1c</sub> <7% (9), SBP <130 mmHg, and DBP <80 mmHg (10) according to the American Diabetes Association, and LDL cholesterol <100 mg/dL according to the American Association for Clinical Endocrinologists (11). Achievement rates for both HbA<sub>1c</sub> <8% and HbA<sub>1c</sub> <7% were analyzed. In this study, the proportion of achievement of all guideline targets for

HbA<sub>1c</sub>, SBP, DBP, and LDL cholesterol was expressed as the “all ABC achievement rate.” “A” stands for HbA<sub>1c</sub>, “B” for BP, and “C” for LDL cholesterol. This study was carried out by the Japan Diabetes Clinical Data Management (JDDM) Study Group as part of the JDDM study; therefore, we named this study ABC Study: JDDM49.

### Study Outcome

The primary objective was to evaluate the all ABC achievement rate for each month (Fig. 1A). Secondary objectives included evaluation of the achievement rates for HbA<sub>1c</sub>, SBP, DBP, and LDL cholesterol for each month (Fig. 1B); the all ABC achievement rates in summer and winter (Fig. 1C); and the achievement

rates for HbA<sub>1c</sub>, SBP, DBP, and LDL cholesterol, respectively, in summer and winter (Fig. 1D). The factors affecting the all ABC achievement rate in summer and winter as well as those affecting the achievement rates for HbA<sub>1c</sub>, SBP, DBP, and LDL cholesterol individually in summer and winter were also studied (Table 2). Objectives also included the following evaluations for the summer and winter: the proportion of patients in the BP target groups (SBP <130 mmHg and DBP <80 mmHg; SBP ≥130 mmHg; or DBP ≥80 mmHg) for each HbA<sub>1c</sub> target group (HbA<sub>1c</sub> <7% or ≥7%) (Supplementary Fig. 2A), the proportion of patients in the LDL cholesterol target groups (LDL cholesterol <100 mg/dL or ≥100 mg/dL) for each HbA<sub>1c</sub> target group (Supplementary Fig. 2B), and the proportion of patients in the BP target groups for each LDL cholesterol target group (Supplementary Fig. 2C).

### Statistical Methods

Patients' characteristics and results are presented as the mean ± SD or the median with the interquartile range, as appropriate according to data distribution. Multiple logistic regression analysis was used to determine the independent associations between achievement of all ABC, HbA<sub>1c</sub>, SBP, DBP, and LDL cholesterol targets, respectively, in summer and winter, and the variables of sex, age, diabetes duration, family history of diabetes, BMI, eGFR, history of hypertension, antihypertensive agent use, history of dyslipidemia, lipid-lowering agent use, antiplatelet drug use, insulin use, sulfonylurea (SU) use, metformin use, dipeptidyl peptidase 4 (DPP-4) inhibitor use, glucagon-like peptide 1 (GLP-1) receptor agonist use, glinide use, α-glucosidase inhibitor use, thiazolidinedione use, current smoking status, and current alcohol drinking status (Table 2). Age, diabetes duration, BMI, and eGFR were included as quadrichotomous variables. For the BMI, which was included as a covariate, the average BMI for summer and winter, respectively, was used for multiple logistic regression analysis. Separate models were constructed using the following dependent variables: in summer and winter, achievement of 1) all ABC, 2) HbA<sub>1c</sub> <7%, 3) SBP <130 mmHg, 4) DBP <80 mmHg, and 5) LDL cholesterol <100 mg/dL. The results were

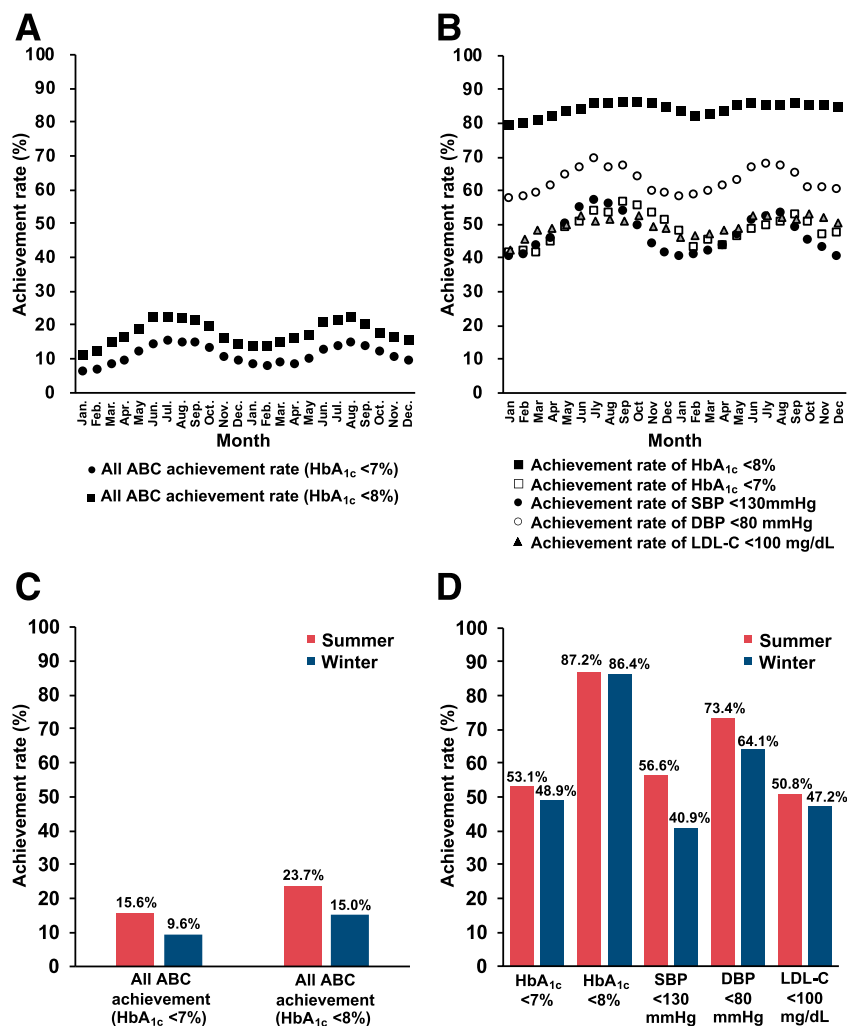

**Figure 1**—Achievement rates for all ABC, HbA<sub>1c</sub>, BP, and LDL cholesterol throughout the year (A and B) and in summer and winter (C and D). A: All ABC (HbA<sub>1c</sub> <7% or <8%), BP, and LDL cholesterol) achievement rates monthly over a period of 2 years. B: Monthly achievement rates for HbA<sub>1c</sub>, BP, and LDL cholesterol over a 2-year period. C: All ABC achievement rates in summer and winter in a 2-year period. D: Achievement rates for HbA<sub>1c</sub> (<7% or <8%), SBP, DBP, and LDL cholesterol in summer and winter in a 2-year period. LDL-C, LDL cholesterol.

expressed as an odds ratio with 95% CI. A *P* value <0.001 was considered significant. Data analyses were performed using the Statistical Package for the Social Sciences version 22.0 software (IBM, Armonk, NY).

## RESULTS

### Baseline Characteristics of Study

#### Participants

A total of 4,678 patients were analyzed. Table 1 shows the characteristics of the study participants. The mean  $\pm$  SD age of participants was  $61.3 \pm 9.4$  years, and the mean HbA<sub>1c</sub> was  $57.2 \pm 13.5$  mmol/mol (mean % HbA<sub>1c</sub>  $7.4 \pm 1.2\%$ ). The prevalence of study participants ever diagnosed with hypertension or dyslipidemia was 65.3% or 83.7%, respectively.

#### Achievement Rates of All ABC, HbA<sub>1c</sub>, BP, and LDL Cholesterol in All Seasons

The achievement rates for all ABC (Fig. 1A), HbA<sub>1c</sub>, BP, and LDL cholesterol varied seasonally (Fig. 1B). The achievement rate for HbA<sub>1c</sub> <8% was the highest, followed by that for DBP <80 mmHg (Fig. 1B). Equivalent achievement rates for HbA<sub>1c</sub> <7%, SBP <130 mmHg, and LDL cholesterol <100 mg/dL were found (Fig. 1B). The achievement rates for all ABC (Fig. 1C), HbA<sub>1c</sub>, SBP, DBP, and LDL cholesterol (Fig. 1D) in the summer were higher than in the winter. Differences between the achievement rates in summer and winter were the largest for SBP (Fig. 1D).

Factors involved in the decrease in achievement rates for all ABC, HbA<sub>1c</sub>, BP, or LDL cholesterol were revealed by the multiple logistic regression analysis (Table 2). In winter, BMI  $\geq 25$  kg/m<sup>2</sup> and diabetes duration  $\geq 10$  years were independently related to lower achievement rates for HbA<sub>1c</sub>. Age  $\geq 65$  years was independently related to the decreased achievement rate for SBP in winter. No obvious factor was related to the decreased achievement rate for LDL cholesterol in winter. The proportions of patients who achieved HbA<sub>1c</sub>, BP, or LDL cholesterol targets within each HbA<sub>1c</sub> target group, BP target group, or LDL cholesterol target group in summer and winter are shown in Supplementary Fig. 2.

## CONCLUSIONS

This is the first clinical study to assess the monthly achievement rates for guideline targets for HbA<sub>1c</sub>, BP, and LDL cholesterol

**Table 1—Baseline characteristics of the study population**

| Data                                                             |                     |
|------------------------------------------------------------------|---------------------|
| No. of patients                                                  | 4,678               |
| Male/female, <i>n</i>                                            | 2,948/1,730         |
| Age (years)                                                      | 61.3 $\pm$ 9.4      |
| Latitude variation of hospitals (degrees North)                  | 26°12'44"–43°11'46" |
| Diabetes duration (years)                                        | 12.6 $\pm$ 8.6      |
| Hypertension, <i>n</i> (%)                                       | 3,055 (65.3)        |
| Dyslipidemia, <i>n</i> (%)                                       | 3,914 (83.7)        |
| Glycemic control                                                 |                     |
| Casual blood glucose (mg/dL)                                     | 161.4 $\pm$ 63.6    |
| HbA <sub>1c</sub> (mmol/mol)                                     | 57.2 $\pm$ 13.5     |
| HbA <sub>1c</sub> (%)                                            | 7.4 $\pm$ 1.2       |
| No. of HbA <sub>1c</sub> measurements in 2 years (times/2 years) | 19.0 $\pm$ 3.7      |
| BP (mmHg)                                                        |                     |
| Systolic                                                         | 133.8 $\pm$ 16.0    |
| Diastolic                                                        | 77.3 $\pm$ 11.5     |
| No. SBP measurements in 2 years (times/2 years)                  | 19.0 $\pm$ 3.7      |
| No. DBP measurements in 2 years (times/2 years)                  | 19.0 $\pm$ 3.7      |
| Lipid profile (mg/dL)                                            |                     |
| TG                                                               | 122 (85–180)        |
| LDL cholesterol                                                  | 107.0 $\pm$ 29.7    |
| HDL cholesterol                                                  | 54.8 $\pm$ 14.5     |
| No. LDL cholesterol measurements in 2 years (times/2 years)      | 17.8 $\pm$ 4.0      |
| BMI (kg/m <sup>2</sup> )                                         |                     |
| Baseline                                                         | 25.5 $\pm$ 4.3      |
| Summer mean                                                      | 25.3 $\pm$ 4.4      |
| Winter mean                                                      | 25.4 $\pm$ 4.3      |
| eGFR (mL/min/1.73 m <sup>2</sup> )                               | 74.4 $\pm$ 20.1     |
| First visit, <i>n</i> (%)                                        |                     |
| January                                                          | 3,701 (79.1)        |
| February                                                         | 715 (15.3)          |
| March                                                            | 85 (1.8)            |
| Others                                                           | 177 (3.8)           |
| Antidiabetic drugs                                               |                     |
| Insulin, <i>n</i> (%)                                            | 1,127 (24.1)        |
| SU, <i>n</i> (%)                                                 | 1,916 (41.0)        |
| Metformin, <i>n</i> (%)                                          | 2,206 (47.2)        |
| DPP-4 inhibitors, <i>n</i> (%)                                   | 2,161 (46.2)        |
| GLP-1 receptor agonists, <i>n</i> (%)                            | 143 (3.1)           |
| Glinides, <i>n</i> (%)                                           | 180 (3.8)           |
| $\alpha$ -Glucosidase inhibitors, <i>n</i> (%)                   | 762 (16.3)          |
| Thiazolidinediones, <i>n</i> (%)                                 | 593 (12.7)          |
| Antihypertensive agents, <i>n</i> (%)                            |                     |
| Antihypertensive agent use for hypertension (%)                  | 75.8                |
| Lipid-lowering agents, <i>n</i> (%)                              |                     |
| Lipid-lowering agent use for dyslipidemia (%)                    | 63.1                |
| Antiplatelet drugs, <i>n</i> (%)                                 | 433 (9.3)           |
| Current smokers, <i>n</i> (%)                                    | 609 (13.0)          |
| Current alcohol drinking, <i>n</i> (%)                           | 966 (20.6)          |

Values are mean  $\pm$  SD or median (25th–75th percentiles) unless otherwise indicated.

and the all ABC achievement rate in those with T2DM. We retrospectively assessed data on patients with T2DM whose HbA<sub>1c</sub>, BP, and LDL cholesterol were measured  $\geq 12$  times during a 2-year period.

The results showed that the achievement rates for guideline targets for HbA<sub>1c</sub>, BP, and LDL cholesterol and

the all ABC achievement rate varied seasonally (Fig. 1A and B). The analysis of achievement rates by season (summer and winter) indicated that the all ABC achievement rate was highest in the summer (June, July, August) and lowest in the winter (December, January, February) (Fig. 1C). As to guideline targets

**Table 2—Multiple logistic regression analysis for achievement of All ABC, HbA<sub>1c</sub> BP, and LDL cholesterol guideline targets in summer and winter**

|                                            | All ABC           |                   | HbA <sub>1c</sub> <7% |                   | SBP <130 mmHg     |                   | DBP <80 mmHg      |                   | LDL-C <100 mg/dL  |                   |
|--------------------------------------------|-------------------|-------------------|-----------------------|-------------------|-------------------|-------------------|-------------------|-------------------|-------------------|-------------------|
|                                            | Summer            | Winter            | Summer                | Winter            | Summer            | Winter            | Summer            | Winter            | Summer            | Winter            |
| Female sex                                 | 0.73 (0.61–0.88)* | 1.10 (0.88–1.38)  | 0.77 (0.67–0.89)*     | 0.87 (0.75–1.00)  | 0.94 (0.82–1.07)  | 1.16 (1.01–1.34)  | 2.61 (2.21–3.09)* | 3.04 (2.61–3.55)* | 0.61 (0.53–0.69)* | 0.72 (0.63–0.83)* |
| Age                                        |                   |                   |                       |                   |                   |                   |                   |                   |                   |                   |
| <45 years (reference)                      | 1.00              | 1.00              | 1.00                  | 1.00              | 1.00              | 1.00              | 1.00              | 1.00              | 1.00              | 1.00              |
| 46–55 years                                | 0.86 (0.53–1.38)  | 0.84 (0.47–1.52)  | 0.86 (0.63–1.18)      | 1.03 (0.75–1.41)  | 1.03 (0.76–1.39)  | 0.76 (0.56–1.03)  | 0.86 (0.63–1.17)  | 0.98 (0.72–1.34)  | 1.12 (0.82–1.51)  | 1.04 (0.77–1.42)  |
| 56–65 years                                | 1.17 (0.76–1.82)  | 0.99 (0.57–1.70)  | 1.11 (0.82–1.49)      | 1.33 (0.98–1.80)  | 1.01 (0.76–1.35)  | 0.65 (0.48–0.87)  | 1.79 (1.33–2.40)* | 2.14 (1.59–2.89)* | 1.29 (0.97–1.73)  | 1.30 (0.97–1.75)  |
| ≥65 years                                  | 1.31 (0.84–2.06)  | 1.21 (0.69–2.11)  | 1.41 (1.04–1.92)      | 1.76 (1.28–2.41)* | 0.79 (0.59–1.07)  | 0.47 (0.34–0.63)* | 3.52 (2.55–4.84)* | 3.78 (2.76–5.18)* | 1.52 (1.13–2.06)  | 1.45 (1.07–1.97)  |
| Diabetes duration                          |                   |                   |                       |                   |                   |                   |                   |                   |                   |                   |
| <1 year (reference)                        | 1.00              | 1.00              | 1.00                  | 1.00              | 1.00              | 1.00              | 1.00              | 1.00              | 1.00              | 1.00              |
| 1–5 years                                  | 0.68 (0.43–1.06)  | 0.84 (0.45–1.54)  | 1.15 (0.80–1.67)      | 0.79 (0.55–1.15)  | 0.99 (0.69–1.40)  | 0.69 (0.48–0.99)  | 1.02 (0.70–1.48)  | 0.80 (0.56–1.16)  | 1.06 (0.74–1.52)  | 1.13 (0.78–1.63)  |
| 5–10 years                                 | 0.58 (0.37–0.90)  | 0.74 (0.40–1.36)  | 0.85 (0.59–1.23)      | 0.62 (0.43–0.89)  | 0.92 (0.65–1.31)  | 0.63 (0.44–0.90)  | 0.93 (0.64–1.35)  | 0.62 (0.43–0.90)  | 1.11 (0.78–1.59)  | 1.18 (0.82–1.70)  |
| ≥10 years                                  | 0.63 (0.41–0.97)  | 0.94 (0.52–1.70)  | 0.66 (0.47–0.94)      | 0.53 (0.37–0.76)* | 0.96 (0.69–1.35)  | 0.77 (0.55–1.10)  | 1.31 (0.91–1.88)  | 1.02 (0.71–1.45)  | 1.12 (0.79–1.58)  | 1.23 (0.86–1.75)  |
| Family history of diabetes                 | 0.92 (0.75–1.13)  | 1.19 (0.93–1.51)  | 0.89 (0.76–1.04)      | 0.94 (0.80–1.10)  | 1.23 (1.06–1.44)  | 1.12 (0.96–1.30)  | 1.40 (1.17–1.69)* | 1.34 (1.13–1.59)* | 0.77 (0.66–0.90)* | 0.86 (0.74–1.01)  |
| BMI                                        |                   |                   |                       |                   |                   |                   |                   |                   |                   |                   |
| <18.5 (kg/m <sup>2</sup> ) (reference)     | 1.00              | 1.00              | 1.00                  | 1.00              | 1.00              | 1.00              | 1.00              | 1.00              | 1.00              | 1.00              |
| 18.5–25 (kg/m <sup>2</sup> )               | 0.76 (0.48–1.18)  | 0.81 (0.45–1.44)  | 1.09 (0.73–1.61)      | 0.71 (0.46–1.10)  | 0.59 (0.39–0.90)  | 0.79 (0.52–1.20)  | 0.86 (0.50–1.47)  | 1.10 (0.67–1.82)  | 0.67 (0.46–0.99)  | 0.71 (0.47–1.08)  |
| 25–30 (kg/m <sup>2</sup> )                 | 0.48 (0.30–0.77)  | 0.52 (0.28–0.95)  | 0.65 (0.43–0.97)      | 0.45 (0.29–0.70)* | 0.45 (0.29–0.69)* | 0.61 (0.40–0.94)  | 0.60 (0.35–1.04)  | 0.83 (0.50–1.37)  | 0.62 (0.42–0.92)  | 0.69 (0.45–1.05)  |
| ≥30 (kg/m <sup>2</sup> )                   | 0.39 (0.23–0.66)* | 0.43 (0.22–0.86)  | 0.50 (0.32–0.77)      | 0.35 (0.22–0.57)* | 0.31 (0.20–0.49)* | 0.43 (0.27–0.68)* | 0.42 (0.24–0.75)* | 0.64 (0.38–1.09)  | 0.60 (0.39–0.91)  | 0.68 (0.43–1.06)  |
| eGFR                                       |                   |                   |                       |                   |                   |                   |                   |                   |                   |                   |
| <30 mL/min/1.73 m <sup>2</sup> (reference) | 1.00              | 1.00              | 1.00                  | 1.00              | 1.00              | 1.00              | 1.00              | 1.00              | 1.00              | 1.00              |
| 30–60 mL/min/1.73 m <sup>2</sup>           | 1.04 (0.49–2.21)  | 0.64 (0.27–1.48)  | 0.82 (0.47–1.42)      | 0.91 (0.52–1.60)  | 1.24 (0.74–2.09)  | 1.04 (0.60–1.79)  | 0.36 (0.15–0.87)  | 0.37 (0.17–0.80)  | 1.36 (0.79–2.33)  | 1.27 (0.74–2.17)  |
| 60–90 mL/min/1.73 m <sup>2</sup>           | 0.91 (0.44–1.92)  | 0.68 (0.30–1.56)  | 0.76 (0.44–1.32)      | 0.81 (0.47–1.40)  | 1.08 (0.65–1.80)  | 1.05 (0.61–1.80)  | 0.24 (0.10–0.58)  | 0.24 (0.11–0.52)* | 1.44 (0.84–2.45)  | 1.28 (0.75–2.17)  |
| ≥90 mL/min/1.73 m <sup>2</sup>             | 0.78 (0.36–1.69)  | 0.66 (0.28–1.58)  | 0.55 (0.31–0.97)      | 0.57 (0.33–1.01)  | 0.93 (0.55–1.58)  | 0.89 (0.51–1.55)  | 0.21 (0.09–0.51)* | 0.26 (0.12–0.55)* | 1.53 (0.88–2.65)  | 1.43 (0.83–2.47)  |
| Hypertension                               | 0.38 (0.28–0.51)* | 0.15 (0.09–0.26)* | 0.99 (0.81–1.20)      | 1.13 (0.93–1.38)  | 0.19 (0.15–0.23)* | 0.11 (0.09–0.14)* | 0.24 (0.20–0.30)* | 0.20 (0.16–0.25)* | 0.97 (0.80–1.17)  | 1.04 (0.86–1.26)  |
| Antihypertensive agent use                 | 2.16 (1.58–2.94)* | 4.87 (2.78–8.53)* | 1.28 (1.06–1.56)      | 1.06 (0.87–1.29)  | 1.91 (1.59–2.30)* | 2.84 (2.26–3.56)* | 1.81 (1.49–2.21)* | 2.16 (1.77–2.62)* | 1.32 (1.09–1.59)  | 1.15 (0.96–1.39)  |
| Dyslipidemia                               | 0.44 (0.34–0.58)* | 0.35 (0.25–0.50)* | 0.53 (0.43–0.65)*     | 0.58 (0.47–0.71)* | 0.93 (0.77–1.13)  | 0.79 (0.65–0.96)  | 0.86 (0.68–1.08)  | 0.89 (0.72–1.09)  | 0.31 (0.26–0.38)* | 0.30 (0.25–0.37)* |
| Lipid-lowering agent use                   | 2.51 (2.00–3.16)* | 3.05 (2.24–4.16)* | 1.40 (1.20–1.63)*     | 1.41 (1.21–1.65)* | 1.28 (1.11–1.49)  | 1.42 (1.21–1.66)* | 0.92 (0.78–1.10)  | 0.90 (0.77–1.06)  | 3.65 (3.13–4.24)* | 3.89 (3.34–4.54)* |
| Antiplatelet drugs                         | 1.19 (0.91–1.56)  | 1.43 (1.04–1.98)  | 0.89 (0.71–1.12)      | 0.96 (0.77–1.21)  | 1.23 (0.99–1.52)  | 1.38 (1.11–1.71)  | 2.11 (1.56–2.86)* | 1.92 (1.48–2.48)* | 1.02 (0.82–1.26)  | 0.99 (0.80–1.23)  |
| Antidiabetic drugs                         |                   |                   |                       |                   |                   |                   |                   |                   |                   |                   |
| Insulin use                                | 0.41 (0.32–0.53)* | 0.30 (0.22–0.42)* | 0.18 (0.15–0.22)*     | 0.17 (0.14–0.21)* | 0.61 (0.52–0.71)* | 0.67 (0.56–0.79)* | 1.06 (0.88–1.28)  | 1.17 (0.98–1.40)  | 1.02 (0.87–1.19)  | 1.01 (0.86–1.18)  |
| SU use                                     | 0.60 (0.50–0.73)* | 0.54 (0.42–0.69)* | 0.35 (0.30–0.41)*     | 0.31 (0.26–0.36)* | 0.84 (0.73–0.97)  | 0.83 (0.71–0.96)  | 1.06 (0.89–1.25)  | 1.09 (0.93–1.27)  | 0.91 (0.79–1.04)  | 0.84 (0.73–0.97)  |
| Metformin use                              | 0.96 (0.80–1.15)  | 0.88 (0.70–1.11)  | 0.92 (0.80–1.06)      | 0.93 (0.81–1.07)  | 0.89 (0.78–1.02)  | 0.83 (0.72–0.95)  | 1.00 (0.85–1.17)  | 0.88 (0.76–1.02)  | 1.40 (1.23–1.60)* | 1.46 (1.28–1.67)* |
| DPP-4 inhibitor use                        | 0.90 (0.75–1.07)  | 0.83 (0.66–1.03)  | 0.71 (0.62–0.82)*     | 0.77 (0.67–0.88)* | 1.02 (0.89–1.16)  | 0.97 (0.85–1.11)  | 0.90 (0.77–1.05)  | 0.81 (0.69–0.93)  | 1.24 (1.09–1.42)  | 1.19 (1.04–1.36)  |
| GLP-1 receptor agonists use                | 0.31 (0.14–0.69)  | 0.36 (0.14–0.90)  | 0.25 (0.16–0.38)*     | 0.26 (0.17–0.42)* | 0.78 (0.53–1.13)  | 0.70 (0.47–1.04)  | 0.84 (0.56–1.27)  | 0.68 (0.46–1.01)  | 1.18 (0.81–1.71)  | 0.95 (0.65–1.38)  |
| Glinitide use                              | 0.87 (0.56–1.35)  | 0.71 (0.41–1.25)  | 0.63 (0.45–0.89)      | 0.76 (0.54–1.08)  | 1.02 (0.73–1.43)  | 1.09 (0.78–1.54)  | 1.07 (0.72–1.60)  | 1.28 (0.88–1.86)  | 1.00 (0.72–1.39)  | 0.84 (0.60–1.17)  |
| α-Glucosidase inhibitor use                | 1.06 (0.85–1.33)  | 1.14 (0.86–1.51)  | 1.22 (1.02–1.46)      | 1.13 (0.93–1.36)  | 1.18 (0.99–1.40)  | 0.94 (0.79–1.12)  | 1.44 (1.17–1.78)* | 1.36 (1.12–1.64)  | 1.07 (0.90–1.27)  | 1.01 (0.85–1.19)  |
| Thiazolidinedione use                      | 1.50 (1.18–1.91)* | 1.15 (0.84–1.57)  | 1.07 (0.88–1.30)      | 1.13 (0.93–1.30)  | 1.28 (1.05–1.55)  | 0.90 (0.73–1.10)  | 1.36 (1.08–1.72)  | 1.37 (1.11–1.70)  | 1.55 (1.27–1.89)* | 1.54 (1.27–1.87)* |
| Current smoker                             | 1.05 (0.81–1.36)  | 1.20 (0.87–1.66)  | 0.80 (0.65–0.98)      | 0.94 (0.76–1.16)  | 1.28 (1.05–1.57)  | 1.00 (0.81–1.22)  | 1.46 (1.16–1.84)  | 1.34 (1.08–1.66)  | 1.08 (0.88–1.31)  | 1.01 (0.83–1.23)  |
| Current alcohol drinking                   | 1.12 (0.89–1.40)  | 0.99 (0.75–1.32)  | 1.31 (1.09–1.58)      | 1.26 (1.05–1.52)  | 1.11 (0.93–1.33)  | 1.20 (1.00–1.44)  | 0.74 (0.60–0.90)  | 0.89 (0.74–1.08)  | 1.19 (1.00–1.43)  | 1.20 (1.01–1.43)  |

Values given are odds ratio (95% CI). \*P < 0.001. LDL-C, LDL cholesterol.

for HbA<sub>1c</sub>, BP, and LDL cholesterol, the achievement rate for SBP was particularly low in the winter (Fig. 1D).

Our results further support existing data showing that there are seasonal variations in blood glucose, BP, and lipid levels (13). However, the limitation of previous studies was that these parameters were measured only once or twice a year. These parameters have been reported to be controlled by various factors, including physical activity (24,25), eating behaviors (25), insulin resistance (26), and body composition (27). Since a previous study (28) reported that resting sympathetic nerve activity varies seasonally, with peak levels evident in winter, the seasonal variation in sympathetic activity may contribute to the all ABC achievement rate. Temperature was also reported to be the most influential factor in seasonal variations in these parameters (13,24). Although this study did not compare achievement rates between the southern and northern areas of Japan, the pattern of seasonal variations in achievement rates can be expected to differ depending on the climate pattern. In fact, in a country with minimal monthly temperature variations, HbA<sub>1c</sub> variations were reported to be small throughout the year (29). Regarding BP, since it was reported that SBP increases by 5.7 mmHg every time the temperature decreases by 10°C regardless of latitude (30), the seasonal variation in the achievement rate may be smaller in areas with small temperature differences between summer and winter, such as southern areas in Japan. On the other hand, during the winter holidays, in particular the New Year holidays, people are customarily physically inactive because of snow and temperature drops, and they traditionally indulge in salty meals, such as soup. Body weight tends to increase over holidays (31), which may be a factor in the yearly increased levels of HbA<sub>1c</sub>, BP, and lipids among persons with T2DM. In fact, HbA<sub>1c</sub> and cholesterol levels were reported to be increased during winter holiday periods (32). Another study (33) reported that adult outpatients in a tropical country have a circannual pattern of HbA<sub>1c</sub> values reflecting holiday celebrations in the preceding 3 months. These reports may explain why it is more difficult for patients with diabetes to meet targets in winter.

This study explored and evaluated factors affecting the rates for the achievement of guideline targets for HbA<sub>1c</sub>, BP, and LDL cholesterol on a monthly basis. In the winter, advanced age was found to be an independent factor for the lower SBP achievement rate. Since the SBP achievement rate was particularly low in winter, these results may be an important factor in lowering the all ABC achievement rate in winter. Among patients of advanced age, atherosclerosis might have prevented meeting BP goals in winter. Atherosclerosis impairs vasodilatability and CV autonomic function (34), and the effectiveness of functions for regulating BP decreases. Therefore, BP increases may be due to the exacerbation of various factors affecting BP in the winter, further decreasing the rate of achieving BP targets. BMI  $\geq 25$  kg/m<sup>2</sup> and diabetes duration  $\geq 10$  years were independently associated with the decreased achievement rates for HbA<sub>1c</sub> in winter. Obese patients with T2DM and/or those with diabetes of a long duration may experience large changes in physical activity and food intake in winter.

The analysis according to antidiabetic drug use revealed that insulin use and SU use were independently associated with decreased all ABC achievement rates in both summer and winter. Insulin and SU are administered to patients whose hyperglycemia is relatively difficult to treat. In fact, Table 2 shows that these drugs were independently associated with decreased HbA<sub>1c</sub> achievement rates. Interestingly, insulin use was independently associated with a lower achievement rate for SBP. Thus, physicians should pay more attention to the all ABC achievement rates throughout the year in patients using these drugs.

A recent investigation of the prognosis of T2DM (35) showed that in patients with T2DM, the percentage of preventable CV events was approximately one-third even if the patient succeeded in smoking cessation in addition to appropriate control of blood glucose, BP, and lipid levels. Causes may be long-term glycemic variability (36,37), long-term BP variability (38,39), and long-term lipid level variability (40), which are residual risk factors for CV events and were not evaluated.

The design and methods of this study had several strengths. First, the study

included data only on patients with T2DM whose HbA<sub>1c</sub>, BP, and LDL cholesterol levels were measured  $\geq 12$  times during a 2-year period. Second, patients with T2DM ( $n = 4,678$ ) from throughout Japan (latitude variation of hospitals [degrees North] 26°12'44"–43°11'46") were analyzed. This study also has some limitations. First was its retrospective design, which carries the risk of selection bias. Second, the number of study patients was small, and participants were a subgroup from a prior study. Third, medication adherence was not considered during the 2-year period. Fourth, the effects of temperature, physical activity, food intake including salt intake, and cultural factors on the achievement rates were not examined. In addition, although the range of the latitudes of the locations of the study hospitals were disclosed, individual hospital data were not disclosed so that we could not examine the effects of latitude differences on achievement rates. Fifth, participants included patients with T2DM who were under treatment for comorbidities such as arterial hypertension and dyslipidemia. Sixth, the basis of treatment for Japanese patients with diabetes differs from that for Caucasian patients, such as metformin use and DPP-4 inhibitor use.

In summary, this study showed that in patients with T2DM, the achievement rates for blood glucose, BP, and lipid target levels varied seasonally, and that the achievement rates for these parameters were lowest in winter. The individual background of each patient would also affect achievement rates. It is important to take seasonal variations in the all ABC achievement rate into consideration in managing patients in ordinary clinical practice. Furthermore, it could be expected that intensifying treatment for each value in the winter might lead to the prevention of CV events. A large-scale clinical trial needs to be conducted to verify which intervention to reduce seasonal variations would lead to the greatest decrease in CV events in the near future.

---

**Duality of Interest.** M.S. has participated in speakers' bureaus/advisory panels for Sanofi, Daiichi-Sankyo, Astellas, and Tanabe-Mitsubishi. N.T. has received a research grant and support

from Daiichi-Sankyo and Otsuka Pharmaceutical and has participated in speakers' bureaus organized by Daiichi-Sankyo and MSD. K.U. has received research support from Terumo, Kowa, Taisho, Kyowa Kirin, Boehringer Ingelheim, Ono, Novo Nordisk, Sumitomo Dainippon, and Tanabe-Mitsubishi and has participated in speakers' bureaus/advisory panels for Boehringer Ingelheim, Tanabe-Mitsubishi, and Eli Lilly. No other potential conflicts of interest relevant to this article were reported.

The funder had no role in study design, analysis, interpretation of data, writing of the manuscript, or the decision to submit the manuscript for publication.

**Author Contributions.** M.S. contributed to the study design, data acquisition, and data analysis; wrote the manuscript; and gave final approval for this version to be published. D.M. and M.N. contributed to the study design and data analysis, wrote the manuscript, and gave final approval for this version to be published. S.M., Y.T., Y.K., N.T., S.I., R.H., and K.U. reviewed the manuscript and edited it for intellectual content and gave final approval for this version to be published. M.S. is the guarantor of this work and, as such, had full access to all the data in the study and takes responsibility for the integrity of the data and the accuracy of the data analysis.

## References

- Gaede P, Vedel P, Larsen N, Jensen GV, Parving HH, Pedersen O. Multifactorial intervention and cardiovascular disease in patients with type 2 diabetes. *N Engl J Med* 2003;348:383–393
- Gerstein HC, Miller ME, Byington RP, et al.; Action to Control Cardiovascular Risk in Diabetes Study Group. Effects of intensive glucose lowering in type 2 diabetes. *N Engl J Med* 2008;358:2545–2559
- Patel A, MacMahon S, Chalmers J, et al.; ADVANCE Collaborative Group. Intensive blood glucose control and vascular outcomes in patients with type 2 diabetes. *N Engl J Med* 2008;358:2560–2572
- UK Prospective Diabetes Study (UKPDS) Group. Intensive blood-glucose control with sulphonylureas or insulin compared with conventional treatment and risk of complications in patients with type 2 diabetes (UKPDS 33) [published correction appears in *Lancet* 1999;354:602]. *Lancet* 1998;352:837–853
- Cushman WC, Evans GW, Byington RP, et al.; ACCORD Study Group. Effects of intensive blood-pressure control in type 2 diabetes mellitus. *N Engl J Med* 2010;362:1575–1585
- Wright JT Jr., Williamson JD, Whelton PK, et al.; SPRINT Research Group. A randomized trial of intensive versus standard blood-pressure control. *N Engl J Med* 2015;373:2103–2116
- Baigent C, Blackwell L, Emberson J, et al.; Cholesterol Treatment Trialists' (CTT) Collaboration. Efficacy and safety of more intensive lowering of LDL cholesterol: a meta-analysis of data from 170,000 participants in 26 randomised trials. *Lancet* 2010;376:1670–1681
- Shepherd J. Resource management in prevention of coronary heart disease: optimising prescription of lipid-lowering drugs. *Lancet* 2002;359:2271–2273
- American Diabetes Association. 6. Glycemic targets: *Standards of Medical Care in Diabetes—2018*. *Diabetes Care* 2018;41(Suppl. 1):S55–S64
- American Diabetes Association. 9. Cardiovascular disease and risk management: *Standards of Medical Care in Diabetes—2018*. *Diabetes Care* 2018;41(Suppl. 1):S86–S104
- Jellinger PS, Handelsman Y, Rosenblit PD, et al. American Association of Clinical Endocrinologists and American College of Endocrinology guidelines for management of dyslipidemia and prevention of cardiovascular disease. *Endocr Pract* 2017;23(Suppl. 2):1–87
- Qaseem A, Wilt TJ, Kansagara D, Horwitz C, Barry MJ, Forciea MA; Clinical Guidelines Committee of the American College of Physicians. Hemoglobin A1c targets for glycemic control with pharmacologic therapy for nonpregnant adults with type 2 diabetes mellitus: a guidance statement update from the American College of Physicians. *Ann Intern Med* 2018;168:569–576
- Liang WW. Seasonal changes in preprandial glucose, A1C, and blood pressure in diabetic patients. *Diabetes Care* 2007;30:2501–2502
- Marti-Soler H, Gubelmann C, Aeschbacher S, et al. Seasonality of cardiovascular risk factors: an analysis including over 230 000 participants in 15 countries. *Heart* 2014;100:1517–1523
- Bardini G, Dicembrini I, Rotella CM, Giannini S. Lipids seasonal variability in type 2 diabetes. *Metabolism* 2012;61:1674–1677
- Desouza CV, Bolli GB, Fonseca V. Hypoglycemia, diabetes, and cardiovascular events. *Diabetes Care* 2010;33:1389–1394
- Cooper-DeHoff RM, Gong Y, Handberg EM, et al. Tight blood pressure control and cardiovascular outcomes among hypertensive patients with diabetes and coronary artery disease. *JAMA* 2010;304:61–68
- Oishi M, Yamazaki K, Okuguchi F, Sugimoto H, Kanatsuka A, Kashiwagi A; Japan Diabetes Clinical Data Management Study Group. Changes in oral antidiabetic prescriptions and improved glycemic control during the years 2002–2011 in Japan (JDDM32). *J Diabetes Investig* 2014;5:581–587
- Seino Y, Nanjo K, Tajima N, et al.; Committee of the Japan Diabetes Society on the Diagnostic Criteria of Diabetes Mellitus. Report of the committee on the classification and diagnostic criteria of diabetes mellitus. *J Diabetes Investig* 2010;1:212–228
- Friedewald WT, Levy RI, Fredrickson DS. Estimation of the concentration of low-density lipoprotein cholesterol in plasma, without use of the preparative ultracentrifuge. *Clin Chem* 1972;18:499–502
- Go AS, Bauman MA, Coleman King SM, et al.; American Heart Association; American College of Cardiology; Centers for Disease Control and Prevention. An effective approach to high blood pressure control: a science advisory from the American Heart Association, the American College of Cardiology, and the Centers for Disease Control and Prevention. *Hypertension* 2014;63:878–885
- James PA, Oparil S, Carter BL, et al. 2014 evidence-based guideline for the management of high blood pressure in adults: report from the panel members appointed to the Eighth Joint National Committee (JNC 8). *JAMA* 2014;311:507–520
- Teramoto T, Sasaki J, Ishibashi S, et al. Diagnostic criteria for dyslipidemia. *J Atheroscler Thromb* 2013;20:655–660
- Ockene IS, Chiriboga DE, Stanek EJ III, et al. Seasonal variation in serum cholesterol levels: treatment implications and possible mechanisms. *Arch Intern Med* 2004;164:863–870
- Ryu OH, Lee S, Yoo HJ, Choi MG. Seasonal variations in glycemic control of type 2 diabetes in Korean women. *J Endocrinol Invest* 2014;37:575–581
- Berglund L, Berne C, Svärdsudd K, Garmo H, Melhus H, Zethelius B. Seasonal variations of insulin sensitivity from a euglycemic insulin clamp in elderly men. *Ups J Med Sci* 2012;117:35–40
- Sohmiya M, Kanazawa I, Kato Y. Seasonal changes in body composition and blood HbA<sub>1c</sub> levels without weight change in male patients with type 2 diabetes treated with insulin. *Diabetes Care* 2004;27:1238–1239
- Cui J, Muller MD, Blaha C, Kunselman AR, Sinoway LI. Seasonal variation in muscle sympathetic nerve activity. *Physiol Rep* 2015;3:e12492
- Higgins T, Saw S, Sikaris K, et al. Seasonal variation in hemoglobin A1c: is it the same in both hemispheres? *J Diabetes Sci Technol* 2009;3:668–671
- Lewington S, Li L, Sherliker P, et al.; China Kadoorie Biobank Study Collaboration. Seasonal variation in blood pressure and its relationship with outdoor temperature in 10 diverse regions of China: the China Kadoorie Biobank. *J Hypertens* 2012;30:1383–1391
- Díaz-Zavala RG, Castro-Cantú MF, Valencia ME, Álvarez-Hernández G, Haby MM, Esparza-Romero J. Effect of the holiday season on weight gain: a narrative review. *J Obes* 2017;2017:2085136
- Chen HS, Jap TS, Chen RL, Lin HD. A prospective study of glycemic control during holiday time in type 2 diabetic patients. *Diabetes Care* 2004;27:326–330
- Hawkins RC. Circannual variation in glycohemoglobin in Singapore. *Clin Chim Acta* 2010;411:18–21
- Gianaros PJ, Jennings JR, Olafsson GB, et al. Greater intima-media thickness in the carotid bulb is associated with reduced baroreflex sensitivity. *Am J Hypertens* 2002;15:486–491
- Vazquez-Benitez G, Desai JR, Xu S, et al. Preventable major cardiovascular events associated with uncontrolled glucose, blood pressure, and lipids and active smoking in adults with diabetes with and without cardiovascular disease: a contemporary analysis. *Diabetes Care* 2015;38:905–912
- Forbes A, Murrells T, Mulnier H, Sinclair AJ. Mean HbA<sub>1c</sub>, HbA<sub>1c</sub> variability, and mortality in people with diabetes aged 70 years and older: a retrospective cohort study. *Lancet Diabetes Endocrinol* 2018;6:476–486
- Hirakawa Y, Arima H, Zoungas S, et al. Impact of visit-to-visit glycemic variability on the risks of macrovascular and microvascular events and all-cause mortality in type 2 diabetes: the ADVANCE trial. *Diabetes Care* 2014;37:2359–2365
- Rothwell PM, Howard SC, Dolan E, et al. Prognostic significance of visit-to-visit variability, maximum systolic blood pressure, and episodic hypertension. *Lancet* 2010;375:895–905

39. Hata J, Arima H, Rothwell PM, et al.; ADVANCE Collaborative Group. Effects of visit-to-visit variability in systolic blood pressure on macrovascular and microvascular complications in patients with type 2 diabetes mellitus: the ADVANCE trial. *Circulation* 2013;128:1325–1334
40. Bangalore S, Breazna A, DeMicco DA, Wun CC, Messerli FH; TNT Steering Committee and Investigators. Visit-to-visit low-density lipoprotein cholesterol variability and risk of cardiovascular outcomes: insights from the TNT trial. *J Am Coll Cardiol* 2015;65:1539–1548
